# Supplementary material for: Using bats as surrogates to effectively target global hotspots for subterranean conservation and monitoring
Source: Research Square preprint supplement (doi:10.21203/rs.3.rs-492875/v3), 2021-11-03
Supplement: Supplementary file 1 [file 26d9b69cc52ef9f4cb5d6d2a.docx]

**Table S1A.** Distribution of cave-dwelling bat species according to families.

| Family | N | % cave | Global N | % global |
| --- | --- | --- | --- | --- |
| Vespertilionidae | 215 | 31.7 | 493.0 | 43.6 |
| Phyllostomidae | 96 | 14.1 | 214.0 | 44.9 |
| Rhinolophidae | 84 | 12.4 | 102.0 | 82.4 |
| Hipposideridae | 81 | 11.9 | 88.0 | 92.0 |
| Pteropodidae | 48 | 7.1 | 197.0 | 24.4 |
| Molossidae | 41 | 6.0 | 122.0 | 33.6 |
| Emballonuridae | 39 | 5.7 | 54.0 | 72.2 |
| Miniopteridae | 25 | 3.7 | 35.0 | 71.4 |
| Mormoopidae | 12 | 1.8 | 17.0 | 70.6 |
| Natalidae | 11 | 1.6 | 11.0 | 100.0 |
| Nycteridae | 8 | 1.2 | 16.0 | 50.0 |
| Megadermatidae | 4 | 0.6 | 6.0 | 66.7 |
| Rhinopomatidae | 4 | 0.6 | 6.0 | 66.7 |
| Furipteridae | 2 | 0.3 | 2.0 | 100.0 |
| Mystacinidae | 2 | 0.3 | 2.0 | 100.0 |
| Myzopodidae | 2 | 0.3 | 2.0 | 100.0 |
| Noctolionidae | 2 | 0.3 | 2.0 | 100.0 |
| Cistugidae | 1 | 0.1 | 2.0 | 50.0 |
| Craseonycteridae | 1 | 0.1 | 1.0 | 100.0 |
| Thyropteridae | 1 | 0.1 | 5.0 | 20.0 |

**Table S1B.** Conservation status of cave-dwelling bats according to families.

| Family | Observed | DD | LC | NT | VU | EN | CE |
| --- | --- | --- | --- | --- | --- | --- | --- |
| Cistugidae | Observed | 0 | 1 | 0 | 0 | 0 | 0 |
|  | % within column | 0.000 % | 0.221 % | 0.000 % | 0.000 % | 0.000 % | 0.000 % |
| Craseonycteridae | Observed | 0 | 0 | 0 | 1 | 0 | 0 |
|  | % within column | 0.000 % | 0.000 % | 0.000 % | 1.852 % | 0.000 % | 0.000 % |
| Emballonuridae | Observed | 5 | 27 | 2 | 3 | 1 | 1 |
|  | % within column | 6.024 % | 5.973 % | 3.704 % | 5.556 % | 4.000 % | 9.091 % |
| Furipteridae | Observed | 0 | 1 | 0 | 1 | 0 | 0 |
|  | % within column | 0.000 % | 0.221 % | 0.000 % | 1.852 % | 0.000 % | 0.000 % |
| Hipposideridae | Observed | 10 | 46 | 7 | 15 | 1 | 2 |
|  | % within column | 12.048 % | 10.177 % | 12.963 % | 27.778 % | 4.000 % | 18.182 % |
| Megadermatidae | Observed | 0 | 3 | 0 | 1 | 0 | 0 |
|  | % within column | 0.000 % | 0.664 % | 0.000 % | 1.852 % | 0.000 % | 0.000 % |
| Miniopteridae | Observed | 8 | 14 | 2 | 0 | 1 | 0 |
|  | % within column | 9.639 % | 3.097 % | 3.704 % | 0.000 % | 4.000 % | 0.000 % |
| Molossidae | Observed | 5 | 30 | 1 | 2 | 3 | 0 |
|  | % within column | 6.024 % | 6.637 % | 1.852 % | 3.704 % | 12.000 % | 0.000 % |
| Mormoopidae | Observed | 0 | 11 | 0 | 0 | 1 | 0 |
|  | % within column | 0.000 % | 2.434 % | 0.000 % | 0.000 % | 4.000 % | 0.000 % |
| Mystacinidae | Observed | 0 | 0 | 0 | 1 | 0 | 1 |
|  | % within column | 0.000 % | 0.000 % | 0.000 % | 1.852 % | 0.000 % | 9.091 % |
| Myzopodidae | Observed | 0 | 2 | 0 | 0 | 0 | 0 |
|  | % within column | 0.000 % | 0.442 % | 0.000 % | 0.000 % | 0.000 % | 0.000 % |
| Natalidae | Observed | 1 | 4 | 4 | 1 | 0 | 1 |
|  | % within column | 1.205 % | 0.885 % | 7.407 % | 1.852 % | 0.000 % | 9.091 % |
| Noctolionidae | Observed | 0 | 2 | 0 | 0 | 0 | 0 |
|  | % within column | 0.000 % | 0.442 % | 0.000 % | 0.000 % | 0.000 % | 0.000 % |
| Nycteridae | Observed | 0 | 6 | 1 | 1 | 0 | 0 |
|  | % within column | 0.000 % | 1.327 % | 1.852 % | 1.852 % | 0.000 % | 0.000 % |
| Phyllostomidae | Observed | 7 | 75 | 6 | 4 | 3 | 1 |
|  | % within column | 8.434 % | 16.593 % | 11.111 % | 7.407 % | 12.000 % | 9.091 % |
| Pteropodidae | Observed | 3 | 27 | 6 | 8 | 2 | 2 |
|  | % within column | 3.614 % | 5.973 % | 11.111 % | 14.815 % | 8.000 % | 18.182 % |
| Rhinolophidae | Observed | 12 | 49 | 8 | 6 | 8 | 1 |
|  | % within column | 14.458 % | 10.841 % | 14.815 % | 11.111 % | 32.000 % | 9.091 % |
| Rhinopomatidae | Observed | 0 | 4 | 0 | 0 | 0 | 0 |
|  | % within column | 0.000 % | 0.885 % | 0.000 % | 0.000 % | 0.000 % | 0.000 % |
| Thyropteridae | Observed | 0 | 1 | 0 | 0 | 0 | 0 |
|  | % within column | 0.000 % | 0.221 % | 0.000 % | 0.000 % | 0.000 % | 0.000 % |
| Vespertilionidae | Observed | 32 | 149 | 17 | 10 | 5 | 2 |
|  | % within column | 38.554 % | 32.965 % | 31.481 % | 18.519 % | 20.000 % | 18.182 % |
